# Supplementary material for: Observational ozone data over the global oceans and polar regions: The TOAR-II Oceans data set version 2024
Source: Copernicus journal article supplement (doi:10.5194/essd-2024-566), 2025-02-13
Supplement: Supplementary file 1 [file essd-2024-566-supplement.pdf]

## Observational ozone data over the global oceans and polar regions: The TOAR-II Oceans data set version 2024

5

Yugo Kanaya et al.

Correspondence to: Yugo Kanaya ([yugo@jamstec.go.jp](mailto:yugo@jamstec.go.jp))

10 **Table S1.** Methods and uncertainties of CO, NO<sub>x</sub>, and CN observations associated with O<sub>3</sub> observations from ship cruises.

| Label | Cruise                           | CO, NO <sub>x</sub> , CN | Uncertainty            |
|-------|----------------------------------|--------------------------|------------------------|
| S1    | MR12: MR12-02                    | Thermo, 48C              | 3% for CO              |
| S2    | MR13: MR13-04, 05, 06, 14-01, 02 | Thermo, 48C              | 3% for CO              |
| S3    | MR14: MR14-04, 05, 06            | Thermo, 48C              | 3% for CO              |
| S4    | MR15: MR15-03, 04, 05            | Thermo, 48C              | 3% for CO              |
| S5    | MR16: MR16-06, 08, 09            | Thermo, 48C              | 3% for CO              |
| S6    | MR17: MR17-05C, 08               | Thermo, 48C              | 3% for CO              |
| S7    | MR18: MR18-04, 05C, 06           | Thermo, 48C              | 3% for CO              |
| S8    | MR19: MR19-03C, 04               | Thermo, 48C              | 3% for CO              |
| S9    | MR20: MR20-E01, 05C, E02, 01     | Thermo, 48iTLE           | 3% for CO              |
| S10   | MR21: MR21-01, 03, 05C, 06       | Thermo, 48iTLE           | 3% for CO              |
| S11   | KH-18-6                          | Thermo, 48iTLE           | 3% for CO              |
| S12   | NAAMES1                          | TSI 3010                 | CO: ±(10 +5%) ppb      |
| S13   | NAAMES2                          | TSI 3010                 |                        |
| S14   | NAAMES3                          | TSI 3010                 |                        |
| S15   | NAAMES4                          | TSI 3010                 |                        |
| S16   | ATOMIC                           | TSI 3010                 |                        |
| S17   | DYNAMO                           | TSI 3010                 |                        |
| S18   | WACS                             | TSI 3010                 |                        |
| S19   | VOCALS                           | TSI 3010                 | ± 2% n/cm <sup>3</sup> |
| S20   | MAGE92                           | N/A                      |                        |
| S21   | RITS93                           | TSI 3076                 |                        |
| S22   | RITS94                           | TSI 3076                 |                        |

|     |                   |                                                                                                                                                                                                            |                                                                                                                                                                                                                                              |
|-----|-------------------|------------------------------------------------------------------------------------------------------------------------------------------------------------------------------------------------------------|----------------------------------------------------------------------------------------------------------------------------------------------------------------------------------------------------------------------------------------------|
| S24 | ACEASIA           | TSI 3760                                                                                                                                                                                                   |                                                                                                                                                                                                                                              |
| S25 | NEAQS 2002        | NO by NO <sub>2</sub> chemiluminescence (custom instrument) Conversion of NO <sub>2</sub> to NO by broadband UV light from 500W Xe lamp                                                                    | NO ±(4%+0.006 ppb); NO <sub>2</sub> ±(7%+0.024 ppb)                                                                                                                                                                                          |
| S26 | NEAQS 2004        | CO AeroLaser AL-5002;NO Chemiluminescence instrument; NO <sub>2</sub> Photolysis of NO <sub>2</sub> and NO detection                                                                                       | CO ±(3% + 1 ppbv); NO ±(4.4%); NO <sub>2</sub> The total estimated accuracy for NO <sub>2</sub> when NO <sub>2</sub> /NO = 3 is ±(6.5% + 93 pptv), increasing to ±11% when NO <sub>2</sub> /NO = 1 and ±23% when NO <sub>2</sub> /NO = 0.33. |
| S27 | TEXAQS 2006       | CO AL 5002, NO by ozone-induced Chemiluminescence, NO <sub>2</sub> by photolysis, followed by ozone-induced chemiluminescence                                                                              | CO: ±3%, NO 3.8% + 0.010 ppbv, see NO <sub>2</sub> _ppbv_var                                                                                                                                                                                 |
| S28 | ICEALOT           | CO AL5002, NO is measured directly by ozone-induced chemiluminescence. NO <sub>2</sub> is partially photolyzed and measured as the difference in signal between a photolyzed and unphotolyzed sample., CNC | CO ± 4.1%, see NO_ppbv_unc and NO <sub>2</sub> _ppbv_unc                                                                                                                                                                                     |
| S29 | CalNex 2010       | CO N/A, NO, NO <sub>2</sub> : N/A                                                                                                                                                                          | CO N/A, NO, NO <sub>2</sub> N/A                                                                                                                                                                                                              |
| S60 | MOSAic            | CO: Cavity ring-down spectrometer (Picarro model G2401)                                                                                                                                                    | manufacturer-specified precisions of 1.0 ppb for 20-s averages, CO 1.5 ppb (5 min)                                                                                                                                                           |
| S62 | AEROSOLS99-INDOEX | TSI 3010                                                                                                                                                                                                   | NA                                                                                                                                                                                                                                           |

15 **Table S2.** Methods and uncertainties of CO, NO<sub>x</sub>, and CN observations associated with O<sub>3</sub> observations from aircraft campaigns.

| Label | Campaign          | CO, NO <sub>x</sub>                                                                                       | Uncertainty                                                                                                 |
|-------|-------------------|-----------------------------------------------------------------------------------------------------------|-------------------------------------------------------------------------------------------------------------|
| A5    | PEM-West A        | TDL, Chemiluminescence, PF/LIF                                                                            | CO 1%, NO ±18%. NO <sub>2</sub> ±20%                                                                        |
| A6    | PEM-West B        | TDL, LIF                                                                                                  | CO 1%, NO ±18%                                                                                              |
| A8    | PEM-Tropics A     | TDL, TP-LIF, PF/TP-LIF                                                                                    | CO 1%, NO 63 ppt, NO <sub>2</sub> 12 ppt                                                                    |
| A9    | PEM-Tropics B P3B | differential absorption IR, chemiluminescence                                                             | CO ±2%, NO, NO <sub>2</sub> : 1.5 ppt                                                                       |
| A10   | PEM-Tropics B DC8 | TDL, TP-LIF, PF/TP-LIF                                                                                    | CO ±2%, NO, NO <sub>2</sub> : see original data files                                                       |
| A11   | TRACE-P P3B       | TDLAS, chemiluminescence                                                                                  | ±2% (CO), ±8%(NO), ±20% (NO <sub>2</sub> )                                                                  |
| A12   | TRACE-P DC8       | TDLAS, TP-LIF                                                                                             | ±2% (CO), ±20-30% (NO, NO <sub>2</sub> )                                                                    |
| A13   | INTEX-NA          | TDLAS, LIF                                                                                                | CO (5% or 1 ppb), NO, NO <sub>2</sub> (5 ppt, 10%)                                                          |
| A14   | INTEX-B DC8       | DACOM, LIF                                                                                                | CO: 5% or 1 ppb, NO, NO <sub>2</sub> 5%, 15%                                                                |
| A15   | INTEX-B C-130     | VUV-fluorescence, chemiluminescence                                                                       | CO: ± 10%, ±(15+7% of the mixing ratio) pptv for NO, ±(15+10% of the mixing ratio) pptv for NO <sub>2</sub> |
| A16   | ARCTAS            | TDLAS, chemiluminescence                                                                                  | CO: 2% or 2 ppb, NO: 7%, NO <sub>2</sub> : 10%                                                              |
| A17   | SEAC4RS DC8       | CO: Diode laser spectrometer, NO: chemiluminescence, NO <sub>2</sub> :UV-LED photolysis/chemiluminescence | CO: 5% or 5 ppb, NO:0.010 ppbv + 4%, NO <sub>2</sub> : 0.030 ppbv + 7%                                      |
| A18   | SEAC4RS ER2       | CO: Picarro Cavity Ringdown Spectrometer                                                                  | CO: 2.5 ppb                                                                                                 |
| A19   | DISCOVER-AQ       | 4ch chemiluminescence                                                                                     | 10 pptv + 10% for NO, 20 pptv + 10% for NO <sub>2</sub>                                                     |
| A20   | KORUS-AQ          | 4ch chemiluminescence, CO: Diode laser spectrometer                                                       | (30 pptv + 20%) for NO, (50 pptv + 30%) for NO <sub>2</sub> , 2% or 2 ppbv for CO                           |
| A21   | ATOM1-4           | 4ch chemiluminescence, PICARRO cavity ringdown spectrometer                                               | NO, NO <sub>2</sub> : 5-10 ppt, 3.6 ppb CO (10 s)                                                           |
| A22   | HIPPO             | VUV fluorescence                                                                                          | CO: 5 ppb                                                                                                   |
| A23   | ACSIS FAAM        | CO: AERO AL5002 instrument                                                                                | N/A                                                                                                         |
| A24   | ACCACIA FAAM      | CO: AERO AL5002 instrument                                                                                | N/A                                                                                                         |
| A25   | CAST FAAM         | CO: AERO AL5002 instrument                                                                                | N/A                                                                                                         |
| A26   | CLARIFY FAAM      | CO: AERO AL5002 instrument                                                                                | N/A                                                                                                         |

|     |             |                                                                                                            |                                                                                                              |
|-----|-------------|------------------------------------------------------------------------------------------------------------|--------------------------------------------------------------------------------------------------------------|
| A27 | ITOP FAAM   | CO: AERO AL5002 instrument                                                                                 | N/A                                                                                                          |
| A28 | VOCALS FAAM | CO: AERO AL5002 instrument                                                                                 | N/A                                                                                                          |
| A31 | TEXAQS2000  | CO vacuum ultraviolet fluorescence; NO/O <sub>3</sub> Chemiluminescence; NO <sub>2</sub> via UV photolysis | CO random uncertainty: 2.5%. NO: $\pm(20 \text{ pptv}+5\%)$ ; NO <sub>2</sub> : $\pm(40 \text{ pptv}+8\%)$ ; |
| A32 | ITCT2002    | CO vacuum ultraviolet fluorescence; NO/O <sub>3</sub> Chemiluminescence; NO <sub>2</sub> via UV photolysis | CO random uncertainty: 2.5%. NO: $\pm(10 \text{ pptv}+5\%)$ ; NO <sub>2</sub> : $\pm(30 \text{ pptv}+10\%)$  |
| A33 | ITCT2004    | CO VUV resonance fluorescence; NO, NO <sub>2</sub> : Photolysis & NO/O <sub>3</sub> Chemiluminescence      | CO 5%, NO_ppbv $\pm(0.010 + 5\%)$ ; NO <sub>2</sub> _ppbv $\pm(0.025 + 8\%)$                                 |
| A35 | TEXAQS2006  | CO VUV resonance fluorescence; NO, NO <sub>2</sub> : Photolysis & NO/O <sub>3</sub> Chemiluminescence      | CO 5% $\pm 1$ ppbv, NO (0.015 ppbv + 5%), NO <sub>2</sub> (0.040 ppbv + 9%)                                  |
| A36 | ARCPAC2008  | CO VUV Resonance Fluorescence, NO, NO <sub>2</sub> : Photolysis and NO/O <sub>3</sub> Chemiluminescence    | CO 3%, NO (0.02 + 8%), NO <sub>2</sub> (0.04 + 10%)                                                          |
| A37 | CalNex2010  | CO VUV Resonance Fluorescence, NO, NO <sub>2</sub> : Photolysis and NO/O <sub>3</sub> Chemiluminescence    | CO 5%, NO (0.01 ppbv + 3%), NO <sub>2</sub> (0.03 ppbv + 4%)                                                 |
| A45 | ACTIVATE    | CO: Picarro Cavity Ringdown Spectrometer                                                                   | CO $\pm 5$ ppb or $\pm 2\%$                                                                                  |
| A46 | CONTRAST    | 2-ch chemiluminescence instrument for NO-NO <sub>2</sub> , CO: Aero-laser AL5002 VUV fluorescence          | CO: 3 ppbv $\pm 3\%$ , See error columns in this original file                                               |
| A47 | TORERO      | CO: Aero-laser AL5002 VUV fluorescence                                                                     | CO: 3 ppbv $\pm 3\%$                                                                                         |

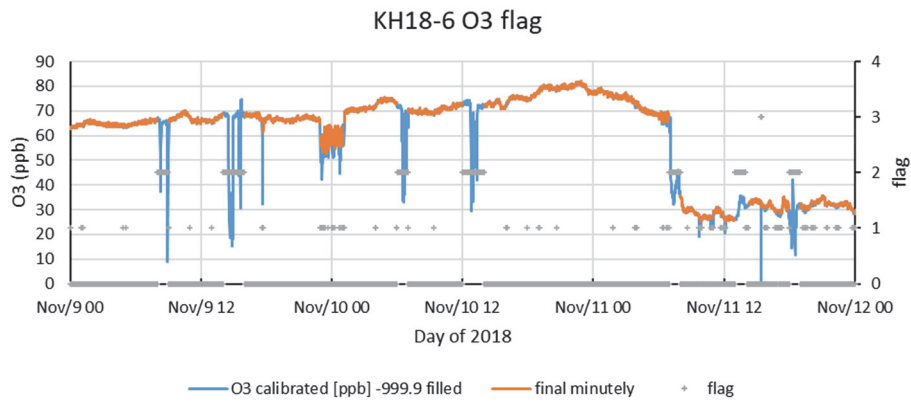

**Figure S1.** Removal of ozone data affected by ship exhaust and instability (blue). Flags (grey, in the right axis) 1: 1-minute based data removed (as lower than hourly average -  $1\sigma$ ), 2: hours with large variability, and 3: no data. The data after removal (orange) are used to calculate the hourly averages.

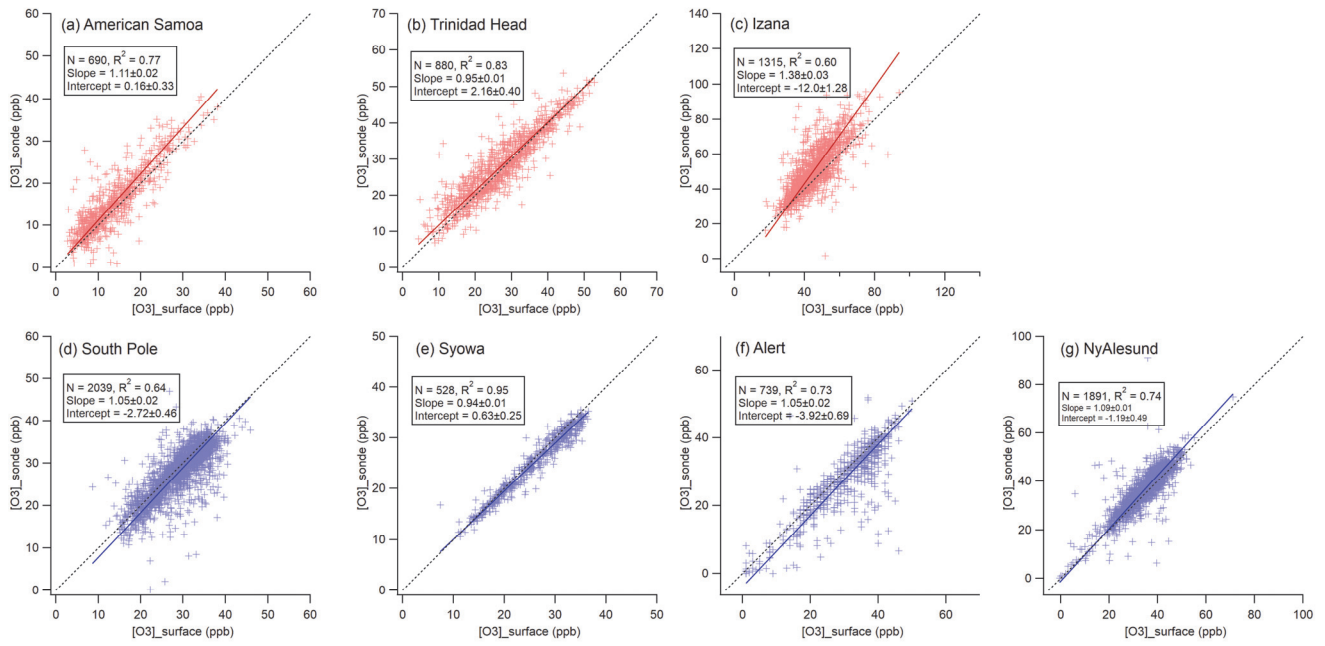

**Figure S2.** Scatterplots between ozonesonde data at the lowest level ( $\sim 200$  m) and surface data at 7 sites with co-located observations. For Izana, the ozonesonde data in the altitude layer of 2200–2400 m were used. The colored lines are the bivariate linear fits. The dashed black lines represent  $y = x$ .
